# Supplementary material for: Complex hydrothermal vent microbial mat communities used to assess primer selection for targeted amplicon surveys from Kama‘ehuakanaloa Seamount
Source: PeerJ. 2024 Sep 16;12:e18099. doi: 10.7717/peerj.18099 (PMC11412224; doi:10.7717/peerj.18099)
Supplement: Supplemental Information 1 [file peerj-12-18099-s001.xlsx]

## Sheet: SupTable1
V3V4 Sample	input	filtered	denoised	merged	nonchim
Bact674Green (Pohaku)	536524	312116 41.83% reads lost from previous step 41.83% reads lost total	305827 2.01% reads lost from previous step 43.00% reads lost total	287901 5.86% reads lost from previous step 46.34% reads lost total	224147 22.14% reads lost from previous step 58.22% reads lost total
Bact674Blue (Pohaku)	704150	425615 39.56% reads lost from previous step 39.56% reads lost total	418378 1.70% reads lost from previous step 40.58% reads lost total	396312 5.27% reads lost from previous step 43.72% reads lost total	319630 19.35% reads lost from previous step 54.61% reads lost total
Bact677Black (Hiolo South)	671908	352141 47.59% reads lost from previous step 47.59% reads lost total	332288 5.64% reads lost from previous step 50.55% reads lost total	289586 12.85% reads lost from previous step 56.90% reads lost total	226794 21.68% reads lost from previous step 66.25% reads lost total
Bact675Black (Hiolo South)	764345	430823 43.64% reads lost from previous step 43.64% reads lost total	415302 3.60% reads lost from previous step 45.67% reads lost total	381774 8.07% reads lost from previous step 50.05% reads lost total	323532 15.26% reads lost from previous step 57.67% reads lost total
Bact677Green (Hiolo North)	710932	343559 51.67% reads lost from previous step 51.67% reads lost total	326062 5.09% reads lost from previous step 54.14% reads lost total	290176 11.01% reads lost from previous step 59.18% reads lost total	239881 17.33% reads lost from previous step 66.26% reads lost total
Bact677Blue (Hiolo North)	678461	346545 48.92% reads lost from previous step 48.92% reads lost total	327689 5.44% reads lost from previous step 51.70% reads lost total	295553 9.81% reads lost from previous step 56.44% reads lost total	255559 13.53% reads lost from previous step 62.33% reads lost total
Bact676Black (Lohiau)	697317	381310 45.32% reads lost from previous step 45.32% reads lost total	358161 6.07% reads lost from previous step 48.64% reads lost total	315104 12.02% reads lost from previous step 54.81% reads lost total	232219 26.30% reads lost from previous step 66.70% reads lost total
Bact676Green (Lohiau)	523552	237707 54.60% reads lost from previous step 54.60% reads lost total	217428 8.53% reads lost from previous step 58.47% reads lost total	183625 15.55% reads lost from previous step 64.93% reads lost total	130311 29.03% reads lost from previous step 75.11% reads lost total
