# Supplementary material for: Complex hydrothermal vent microbial mat communities used to assess primer selection for targeted amplicon surveys from Kama‘ehuakanaloa Seamount
Source: PeerJ. 2024 Sep 16;12:e18099. doi: 10.7717/peerj.18099 (PMC11412224; doi:10.7717/peerj.18099)
Supplement: Supplemental Information 2 [file peerj-12-18099-s002.xlsx]

## Sheet: SupTable2
V4V5 Sample	input	filtered	denoised	merged	nonchim
Uni674Green (Pohaku)	631884	354032 43.97% reads lost from previous step 43.97% reads lost total	351996 0.58% reads lost from previous step 44.29% reads lost total	345154 1.94% reads lost from previous step 45.38% reads lost total	316986 8.16% reads lost from previous step 49.83% reads lost total
Uni674Blue (Pohaku)	676630	390580 42.28% reads lost from previous step 42.28% reads lost total	387773 0.72% reads lost from previous step 42.69% reads lost total	378857 2.30% reads lost from previous step 44.01% reads lost total	348909 7.91% reads lost from previous step 48.43% reads lost total
Uni677Black (Hiolo South)	731706	400832 45.22% reads lost from previous step 45.22% reads lost total	390065 2.69% reads lost from previous step 46.69% reads lost total	360354 7.62% reads lost from previous step 50.75% reads lost total	316860 12.07% reads lost from previous step 56.70% reads lost total
Uni675Black (Hiolo South)	713753	387859 45.66% reads lost from previous step 45.66% reads lost total	384187 0.95% reads lost from previous step 46.17% reads lost total	374436 2.54% reads lost from previous step 47.54% reads lost total	365477 2.39% reads lost from previous step 48.80% reads lost total
Uni677Green (Hiolo North)	739724	395620 46.52% reads lost from previous step 46.52% reads lost total	388541 1.80% reads lost from previous step 47.47% reads lost total	369874 4.80% reads lost from previous step 50.0% reads lost total	342737 7.34% reads lost from previous step 53.67% reads lost total
Uni677Blue (Hiolo North)	765667	390372 49.02% reads lost from previous step 49.02% reads lost total	379535 2.78% reads lost from previous step 50.43% reads lost total	354440 6.61% reads lost from previous step 53.71% reads lost total	327206 7.68% reads lost from previous step 57.27% reads lost total
Uni676Black (Lohiau)	684834	359354 47.53% reads lost from previous step 47.53% reads lost total	354785 1.27% reads lost from previous step 48.19% reads lost total	339673 4.26% reads lost from previous step 50.4% reads lost total	320145 4.99% reads lost from previous step 53.25% reads lost total
Uni676Green (Lohiau)	711945	400198 43.79% reads lost from previous step 43.79% reads lost total	392078 2.03% reads lost from previous step 44.93% reads lost total	372252 5.06% reads lost from previous step 47.71% reads lost total	342638 7.96% reads lost from previous step 51.87% reads lost total
